# Supplementary material for: Influence of N1-Methylpseudouridine in Guide RNAs on CRISPR/Cas9 Activity
Source: MDPI journal article supplement (doi:10.3390/ijms242317116), 2023-12-04
Supplement: s1 [file s1]

## Supplementary Materials

**Table S1.** Sequence of target strand of DNA duplexes used as substrates for Cas9/sgRNA or crRNA:tracrRNA cleavage.

| Name                         | Structure (5'-3')                                                                                                                                                                                                                                                                                                                                                                                                                                                                                                                                                                                            |
|------------------------------|--------------------------------------------------------------------------------------------------------------------------------------------------------------------------------------------------------------------------------------------------------------------------------------------------------------------------------------------------------------------------------------------------------------------------------------------------------------------------------------------------------------------------------------------------------------------------------------------------------------|
| DNA_target strand<br>(531nt) | TTGTGTCTTCGTCAGTCCCGAGTCCCTTCATGGCTTTCCGCAGCGCT<br>TTGGCATCTGCGTCAGGGTTGAAGTCATTGGCTGGGCGCACAGTTC<br>CCTTCAGCTCTACTCGGGCCACTGCACTAAGTTCCACATCTGATA<br>GGCCACCTGCGCTGCCTCCGGAAGAACTGGCCAGCAGCATCATC<br>ATCTCCCCCAGACAGCTTCAGCAGAGTCTTCTGTACTCGCCAGAG<br>GTGTCATTCTTGATCATGCTGTAGAGGGACTTCTCATACTTGGTCC<br>GGAAGATCT <b>CCC</b> GAATGTCGAGCATGTCCA <b>ACT</b> CACTACGGGAGA<br>CCATGATGCGGATCAGGGTGTGTCCCGAGTCCCCAGGCCCTTCAT<br>AGCCTTGAAGAGCCTTTCAGCAAAATATTCCGGGGTGCTCCGGAT<br>ACACTTCACTACGGCCAGCATTAGCTTCTCAAAGTCCCCAGACAG<br>CTCCCCTCGGATGCTGGCTTCAATCGGCTTCCCTGTGGTCTTCAGAT<br>ACTCATCGAACACCAACCGAAGATGC |

The spacer in the DNA duplex is underlined and the PAM is in red and bold.

**Table S2.** Amplification primers used to generate the fluorescently labeled DNA duplexes.

| Name                       | Structure (5'-3')         |
|----------------------------|---------------------------|
| F_ANX                      | gcatcttcggttggtgttcg      |
| R-FAM_ANX_target<br>strand | FAM-ttgtgtcttcgtagtcccg   |
| F_ANX_mismatch             | aatattttgctgaaaggctcttcaa |

**Table S3.** Calculated P-values for the specificity experiment (for Figure 3A, B).

| Name of sample  | P-value |
|-----------------|---------|
| sgRNA_m1Ψ_WT    | 0,00058 |
| sgRNA_m1Ψ_S1    | 0,00014 |
| sgRNA_m1Ψ_S2    | 0,00053 |
| sgRNA_m1Ψ_S3    | 0,00003 |
| sgRNA_m1Ψ_S4    | 0,00005 |
| sgRNA_m1Ψ_S5    | 0,00042 |
| sgRNA_m1Ψ_S6    | 0,00000 |
| sgRNA_m1Ψ_S7    | 0,00056 |
| sgRNA_m1Ψ_S8    | 0,00004 |
| sgRNA_m1Ψ_S9    | 0,00036 |
| sgRNA_m1Ψ_S10   | 0,00001 |
| sgRNA_m1Ψ_D9,10 | 0,00011 |

|                   |         |
|-------------------|---------|
| sgRNA_m1Ψ_D11,12  | 0,00007 |
| sgRNA_ m1Ψ_D13,14 | 0,00146 |
| sgRNA_ m1Ψ_D15,16 | 0,00055 |
| sgRNA_ m1Ψ_D17,18 | 0,00063 |
| sgRNA_ m1Ψ_D19,20 | 0,00020 |

**Table S4.** Sequences of mutant DNA substrates used for the experiments determining specificity of the CRISPR-Cas9 system.

| Name; S- single-point mismatch; D- double-point mismatches | Sequence, spacer region (5'-3') |
|------------------------------------------------------------|---------------------------------|
| WT                                                         | GAATGTCGAGCATGTCCAAC            |
| S1                                                         | <u>C</u> AATGTCGAGCATGTCCAAC    |
| S2                                                         | G <u>T</u> ATGTCGAGCATGTCCAAC   |
| S3                                                         | GA <u>T</u> TGTCGAGCATGTCCAAC   |
| S4                                                         | GAA <u>A</u> GTCGAGCATGTCCAAC   |
| S5                                                         | GAAT <u>C</u> TCGAGCATGTCCAAC   |
| S6                                                         | GAATG <u>A</u> CGAGCATGTCCAAC   |
| S7                                                         | GAATGT <u>G</u> GAGCATGTCCAAC   |
| S8                                                         | GAATGT <u>C</u> CAGCATGTCCAAC   |
| S9                                                         | GAATGTCG <u>T</u> GCATGTCCAAC   |
| S10                                                        | GAATGTCGA <u>C</u> CATGTCCAAC   |
| D9,10                                                      | GAATGTCG <u>T</u> CCATGTCCAAC   |
| D11,12                                                     | GAATGTCGAG <u>G</u> TTGTCCAAC   |
| D13,14                                                     | GAATGTCGAGCA <u>A</u> CTCCAAC   |
| D15,16                                                     | GAATGTCGAGCATG <u>A</u> GCAAC   |
| D17,18                                                     | GAATGTCGAGCATGTC <u>G</u> TAC   |
| D19,20                                                     | GAATGTCGAGCATGTCC <u>A</u> TG   |

Mismatches in DNA duplexes are underlined.

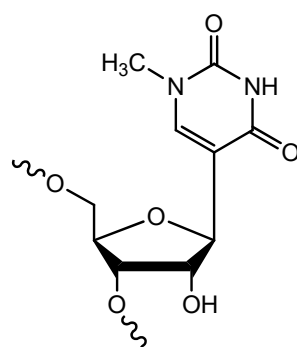

**Figure S1.** Structure of N1-methylpseudouridine (m1Ψ).

Created with SnapGene®

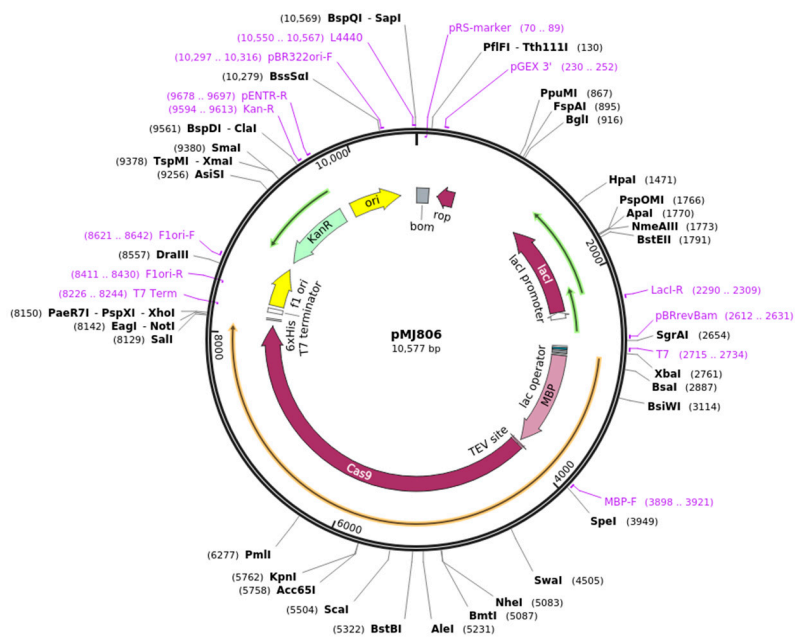

**Figure S3.** Map of pMJ806 plasmid

**RC202086**  
(6.9 kb)

SV40 ori

Kan<sup>r</sup>/Neo

Col E1

PolyA signal

Myc-DDK

XL39 primer

CMV promoter

VP1.5 primer

T7 promoter

SgfI

ANXA6

**Figure S6.** The controls of plasmids in the cleavage assay. Plasmids pANXA6 without Cas9 (C-) were used as negative controls. Cleavage of plasmids by Cas9 complex with unmodified sgRNA. To obtain positive controls (C+), the plasmids were digested with restriction enzymes: MluI (pANXA6). Linear (l) and supercoiled (sc) forms are indicated

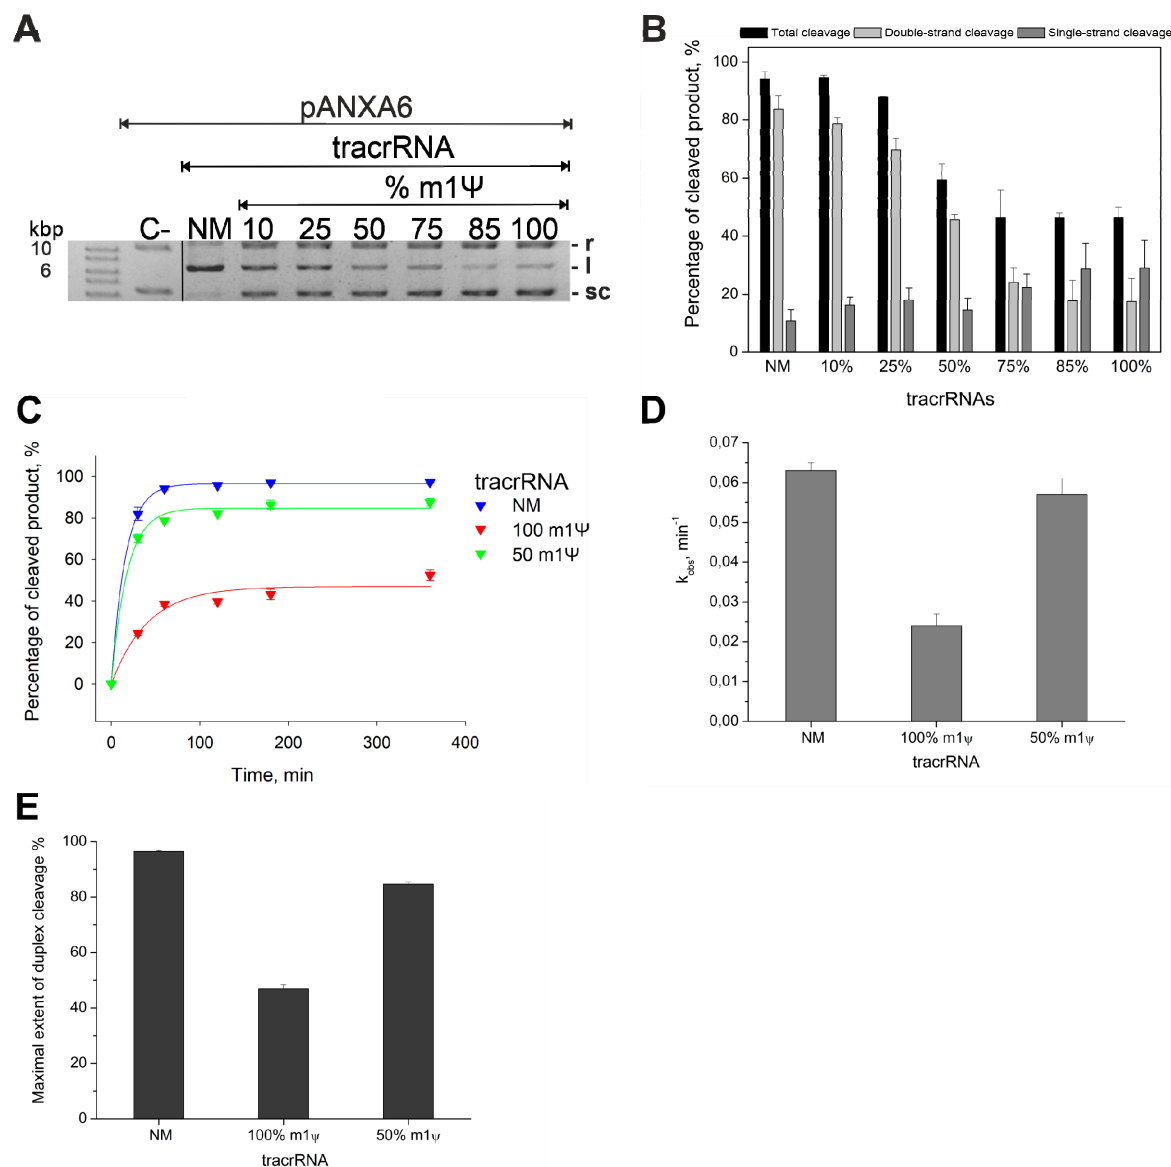

**Figure S7.** The effect of N1-methylpseudouridine in tracrRNA on the efficiency of the CRISPR/Cas9 system *in vitro*. (A) Cleavage of the pANXA6 plasmid by Cas9 with crRNA and tracrRNAs, modified to various m1Ψ depth, and with unmodified tracrRNA (NM). Plasmid without Cas9 (C-) was used as negative control. The two top bands are the cleavage products (relaxed (r) and linear (l) form), while the bottom band is the substrate (supercoiled (sc) form). The molar ratio of Cas9 RNP to target plasmid was 50:1 and the cleavage reactions were stopped after 60 min. (B) The percentage of cleaved plasmid by Cas9 targeted by the modified tracrRNAs. (C) Time-course of duplex cleavage by Cas9/crRNA:tracrRNA with m1Ψ modification 100 and 50%. Unmodified tracrRNA (NM) was used as reaction control. (D) Observed

rate constants ( $k_{obs}$ ). (E) Maximal extent of duplex cleavage ( $A_{max}$ ). Data are shown as means  $\pm$  SD from three independent experiments.

|                                                          |                       |  |  |  |                                                          |                      |  |  |  |
|----------------------------------------------------------|-----------------------|--|--|--|----------------------------------------------------------|----------------------|--|--|--|
| DNA duplex                                               | PAM                   |  |  |  | 3'-GGGCTTACAGCTCGTACAGGTTG- 5' non-target strand         |                      |  |  |  |
|                                                          |                       |  |  |  | 5'- GAATGTCGAGCATGTCCAAC- 3' target strand               |                      |  |  |  |
|                                                          |                       |  |  |  | 1 3 10 20                                                |                      |  |  |  |
| Single-point DNA mutants<br>Target-binding region, 5'-3' |                       |  |  |  | Double-point DNA mutants<br>Target-binding region, 5'-3' |                      |  |  |  |
| WT                                                       | GAATGTCGAGCATGTCCAAC  |  |  |  | WT                                                       | GAATGTCGAGCATGTCCAAC |  |  |  |
| S1                                                       | CAATGTCGAGCATGTCCAAC  |  |  |  | D9,10                                                    | GAATGTCGTCATGTCCAAC  |  |  |  |
| S2                                                       | GTATGTCGAGCATGTCCAAC  |  |  |  | D11,12                                                   | GAATGTCGAGGTTGTCCAAC |  |  |  |
| S3                                                       | GAATTGTCGAGCATGTCCAAC |  |  |  | D13,14                                                   | GAATGTCGAGCAACTCCAAC |  |  |  |
| S4                                                       | GAAAGTCGAGCATGTCCAAC  |  |  |  | D15,16                                                   | GAATGTCGAGCATGAGCAAC |  |  |  |
| S5                                                       | GAATCTCGAGCATGTCCAAC  |  |  |  | D17,18                                                   | GAATCTCGAGCATGTCGTAC |  |  |  |
| S6                                                       | GAATGACGAGCATGTCCAAC  |  |  |  | D19,20                                                   | GAATGACGAGCATGTCCATG |  |  |  |
| S7                                                       | GAATGTGGAGCATGTCCAAC  |  |  |  | N - mismatch                                             |                      |  |  |  |
| S8                                                       | GAATGTCCAGCATGTCCAAC  |  |  |  |                                                          |                      |  |  |  |
| S9                                                       | GAATGTCTGTCATGTCCAAC  |  |  |  |                                                          |                      |  |  |  |
| S10                                                      | GAATGTGACCATGTCCAAC   |  |  |  |                                                          |                      |  |  |  |

**Figure S8.** The protospacer sequences of DNA substrates with single-point (S1-S10) or double-point (D9,10-D19,20) mismatches. A set of sixteen DNA substrates with mismatches related to the Psp1 protospacer from the ANXA6 gene. The Psp1 sequences of DNA substrates with single- (S1-S10) or double-nucleotide (D9,10-D19,20) mismatches, marked in orange. The DNA numbers of the substrates correspond to the positions of the mutations from the 5'-end. WT, control unmodified DNA duplex.

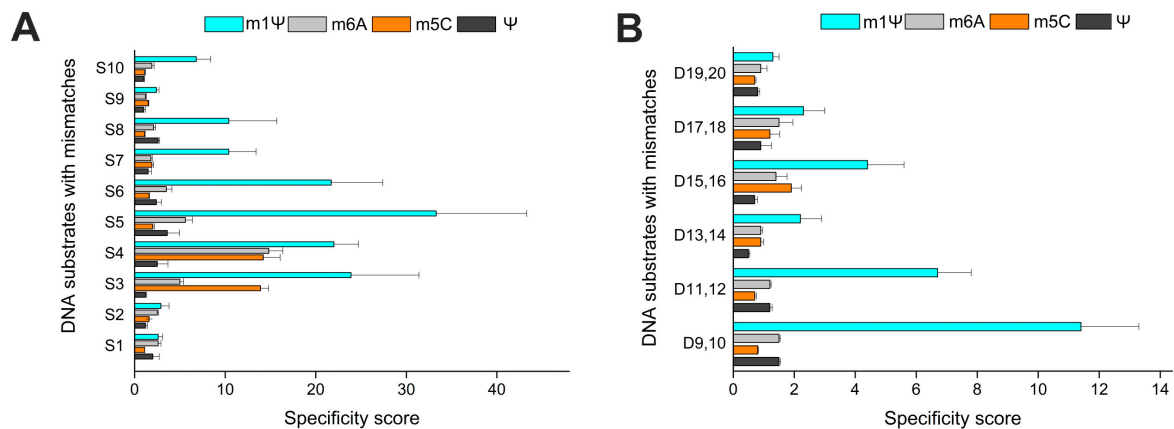

**Figure S9.** The effect of natural occurring modifications in gRNA on the specificity of CRISPR/Cas9 in vitro. (A, B) Specificity scores for single- (A) and double-nucleotide mismatch-containing substrates (B) targeted by sgRNAs modified with m1Ψ, m6A, m5C and Ψ. The cleavage reactions of DNA duplexes were carried out with a 25-fold excess of Cas9/sgRNA and stopped after 60 min. Means  $\pm$  SD from three independent experiments are shown.

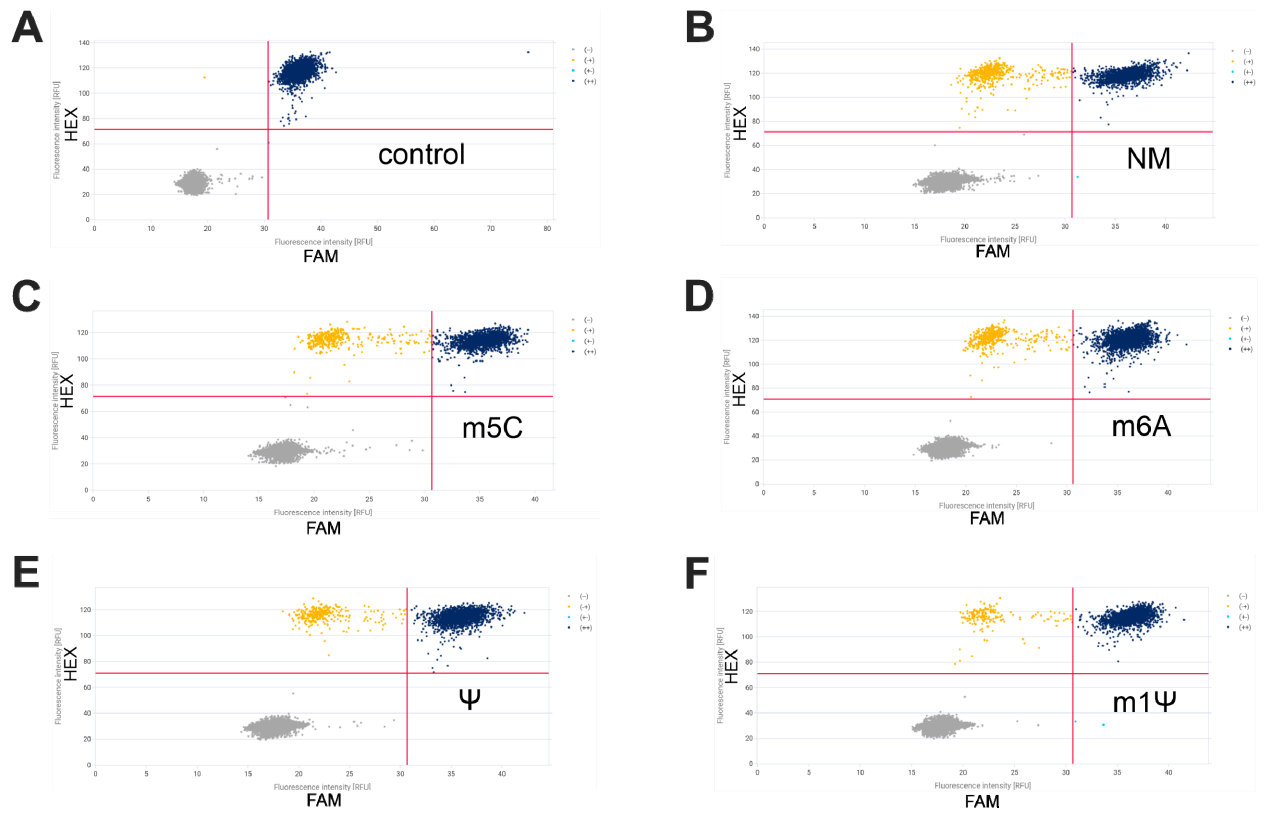

**Figure S10.** Two-dimensional dPCR plots for modified sgRNAs. (A-F) The results of dPCR for HEK293T control cells (A), for unmodified control RNA NM (B) and for sgRNAs modified with 5-methylcytidine-m5C (C) and 50% N6-methyladenosine-m6A (D), pseudouridine - $\Psi$  (E) and N1-methylpseudouridine m1 $\Psi$  (F). The Y axis shows fluorescence intensity for the HEX channel (reference probe) and the X axis shows the fluorescence intensity for the FAM channel (mutation-site-specific probe).
