# Supplementary material for: Influence of N1-Methylpseudouridine in Guide RNAs on CRISPR/Cas9 Activity
Source: MDPI journal article supplement (doi:10.3390/ijms242317116), 2023-12-04
Supplement: s1 [file s1]

## Supplementary Tables

**Table S1.** Sequence of target strand of DNA duplexes used as substrates for Cas9/sgRNA or crRNA:tracrRNA cleavage.

| Name                         | Structure (5'-3')                                                                                                                                                                                                                                                                                                                                                                                                                                                                                                                                                                                                            |
|------------------------------|------------------------------------------------------------------------------------------------------------------------------------------------------------------------------------------------------------------------------------------------------------------------------------------------------------------------------------------------------------------------------------------------------------------------------------------------------------------------------------------------------------------------------------------------------------------------------------------------------------------------------|
| DNA_target strand<br>(531nt) | TTGTGTCTTCGTCAGTCCCGAGTCCCTTCATGGCTTTCCGC<br>AGCGCTTTGGCATCTGCGTCAGGGTTGAAGTCATTGGCTG<br>GGCGCACAGTTCCCTTCAGCTCTACTCGGGCCACTGCACT<br>AAGTTCCCACATCTGATAGGCCACCTGCGCTGCCTCCGGG<br>AAGAACTGGCCAGCAGCATCATCTCCCCCAGACAGCT<br>TCAGCAGAGTCTTCTTGTACTCGCCAGAGGTGTCATTCTT<br>GATCATGCTGTAGAGGGACTTCTCATACTTGGTCCGGAAG<br>ATCT <b>CCC</b> <u>GAA</u> TGTCGAGCATGTCCA <u>ACT</u> CACTACGGGAG<br>ACCATGATGCGGATCAGGGTGTGTCCCGAGTCCCCAGGC<br>CCTTCATAGCCTTGAAGAGCCTTTCAGCAAAATATTCCGG<br>GGTGCTCCGGATACACTTCACTACGGCCAGCATTAGCTTC<br>TCAAAGTCCCCAGACAGCTCCCCTCGGATGCTGGCTTCAA<br>TCGGCTTCCCTGTGGTCTTCAGATACTCATCGAACACCAA<br>CCGAAGATGC |

The spacer in the DNA duplex is underlined and the PAM is in red and bold.

**Table S2.** Amplification primers used to generate the fluorescently labeled DNA duplexes.

| Name                    | Structure (5'-3')         |
|-------------------------|---------------------------|
| F_ANX                   | gcatcttcggttggtgttcg      |
| R-FAM_ANX_target strand | FAM-ttgtgtcttcgtcagtcceg  |
| F_ANX_mismatch          | aatattttgctgaaaggctcttcaa |

**Table S3.** Calculated P-values for the specificity experiment (for Figure 3A, B).

| Name of sample | P-value |
|----------------|---------|
| sgRNA_m1Ψ_WT   | 0,00058 |
| sgRNA_m1Ψ_S1   | 0,00014 |
| sgRNA_m1Ψ_S2   | 0,00053 |
| sgRNA_m1Ψ_S3   | 0,00003 |
| sgRNA_m1Ψ_S4   | 0,00005 |
| sgRNA_m1Ψ_S5   | 0,00042 |
| sgRNA_m1Ψ_S6   | 0,00000 |
| sgRNA_m1Ψ_S7   | 0,00056 |
| sgRNA_m1Ψ_S8   | 0,00004 |
| sgRNA_m1Ψ_S9   | 0,00036 |
| sgRNA_m1Ψ_S10  | 0,00001 |

|                  |         |
|------------------|---------|
| sgRNA_m1Ψ_D9,10  | 0,00011 |
| sgRNA_m1Ψ_D11,12 | 0,00007 |
| sgRNA_m1Ψ_D13,14 | 0,00146 |
| sgRNA_m1Ψ_D15,16 | 0,00055 |
| sgRNA_m1Ψ_D17,18 | 0,00063 |
| sgRNA_m1Ψ_D19,20 | 0,00020 |

**Table S4.** Sequences of mutant DNA substrates used for the experiments determining specificity of the CRISPR-Cas9 system.

| Name; S- single-point mismatch; D- double-point mismatches | Sequence, spacer region (5'-3') |
|------------------------------------------------------------|---------------------------------|
| WT                                                         | GAATGTCGAGCATGTCCAAC            |
| S1                                                         | <u>C</u> AATGTCGAGCATGTCCAAC    |
| S2                                                         | G <u>T</u> ATGTCGAGCATGTCCAAC   |
| S3                                                         | GAT <u>T</u> GTCGAGCATGTCCAAC   |
| S4                                                         | GAA <u>A</u> GTCGAGCATGTCCAAC   |
| S5                                                         | GAAT <u>C</u> TCGAGCATGTCCAAC   |
| S6                                                         | GAATG <u>A</u> CGAGCATGTCCAAC   |
| S7                                                         | GAATGT <u>G</u> GAGCATGTCCAAC   |
| S8                                                         | GAATGTCC <u>A</u> GAGCATGTCCAAC |
| S9                                                         | GAATGTCG <u>T</u> GAGCATGTCCAAC |
| S10                                                        | GAATGTCGAC <u>C</u> ATGTCCAAC   |
| D9,10                                                      | GAATGTCG <u>TCC</u> ATGTCCAAC   |
| D11,12                                                     | GAATGTCGAG <u>GTT</u> GTCCAAC   |
| D13,14                                                     | GAATGTCGAGCA <u>ACT</u> CCAAC   |
| D15,16                                                     | GAATGTCGAGCATG <u>AG</u> CAAC   |
| D17,18                                                     | GAATGTCGAGCATGTC <u>GT</u> AC   |
| D19,20                                                     | GAATGTCGAGCATGTCCAT <u>G</u>    |

Mismatches in DNA duplexes are underlined.
