# Supplementary material for: Influence of N1-Methylpseudouridine in Guide RNAs on CRISPR/Cas9 Activity
Source: Int J Mol Sci. 2023 Dec 4;24(23):17116. doi: 10.3390/ijms242317116 (PMC10707292; doi:10.3390/ijms242317116)
Supplement: Supplementary file 1 [file ijms-24-17116-s001.zip]

Archive with 12 entries (12 files):
- Figure S1.tif
- Figure S10.tif
- Figure S2.png
- Figure S3.png
- Figure S4.png
- Figure S5.jpg
- Figure S6.tif
- Figure S7.tif
- Figure S8.tif
- Figure S9.tif
- Supplementary Tables_revision.pdf
- Supplementary_full_revision.pdf
